# Supplementary material for: Long-term outcomes of coronary artery bypass grafting versus stent-PCI for unprotected left main disease: a meta-analysis
Source: PubMed Central journal article supplement (PMC5588710; doi:10.1186/s12872-017-0664-5), 2017-09-06
Supplement: 12872_2017_664_MOESM2_ESM.pdf [file 12872_2017_664_MOESM2_ESM.pdf]

*Random sequence generation (selection bias)*

*Allocation concealment (selection bias)*

*Blinding (performance bias and detection bias)*

*Incomplete outcome data (attrition bias)*

*Selective reporting (reporting bias)*

|                       |                                                                                     |                                                                                     |                                                                                     |                                                                                       |                                                                                       |                                                                                       |
|-----------------------|-------------------------------------------------------------------------------------|-------------------------------------------------------------------------------------|-------------------------------------------------------------------------------------|---------------------------------------------------------------------------------------|---------------------------------------------------------------------------------------|---------------------------------------------------------------------------------------|
| <b>EXCEL 2016</b>     |  |  |  |  |  |  |
| <b>NOBLE 2016</b>     |  |  |  |  |  |  |
| <b>LE MANS 2016</b>   |  |  |  |  |  |  |
| <b>PRECOMBAT 2015</b> |  |  |  |  |  |  |
| <b>SYNTAX 2014</b>    |  |  |  |  |  |  |
