# Supplementary material for: Long-term outcomes of coronary artery bypass grafting versus stent-PCI for unprotected left main disease: a meta-analysis
Source: PubMed Central journal article supplement (PMC5588710; doi:10.1186/s12872-017-0664-5), 2017-09-06

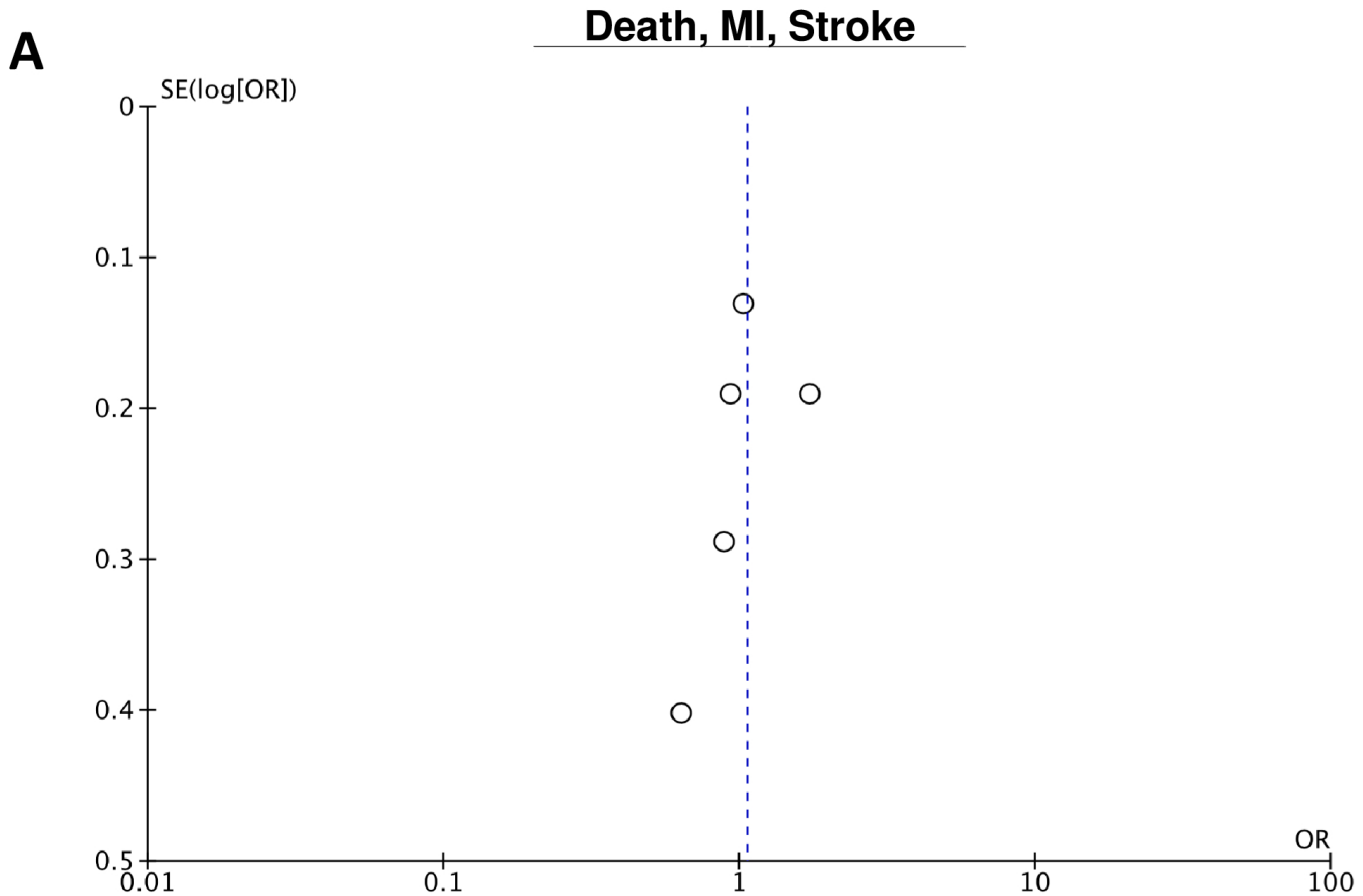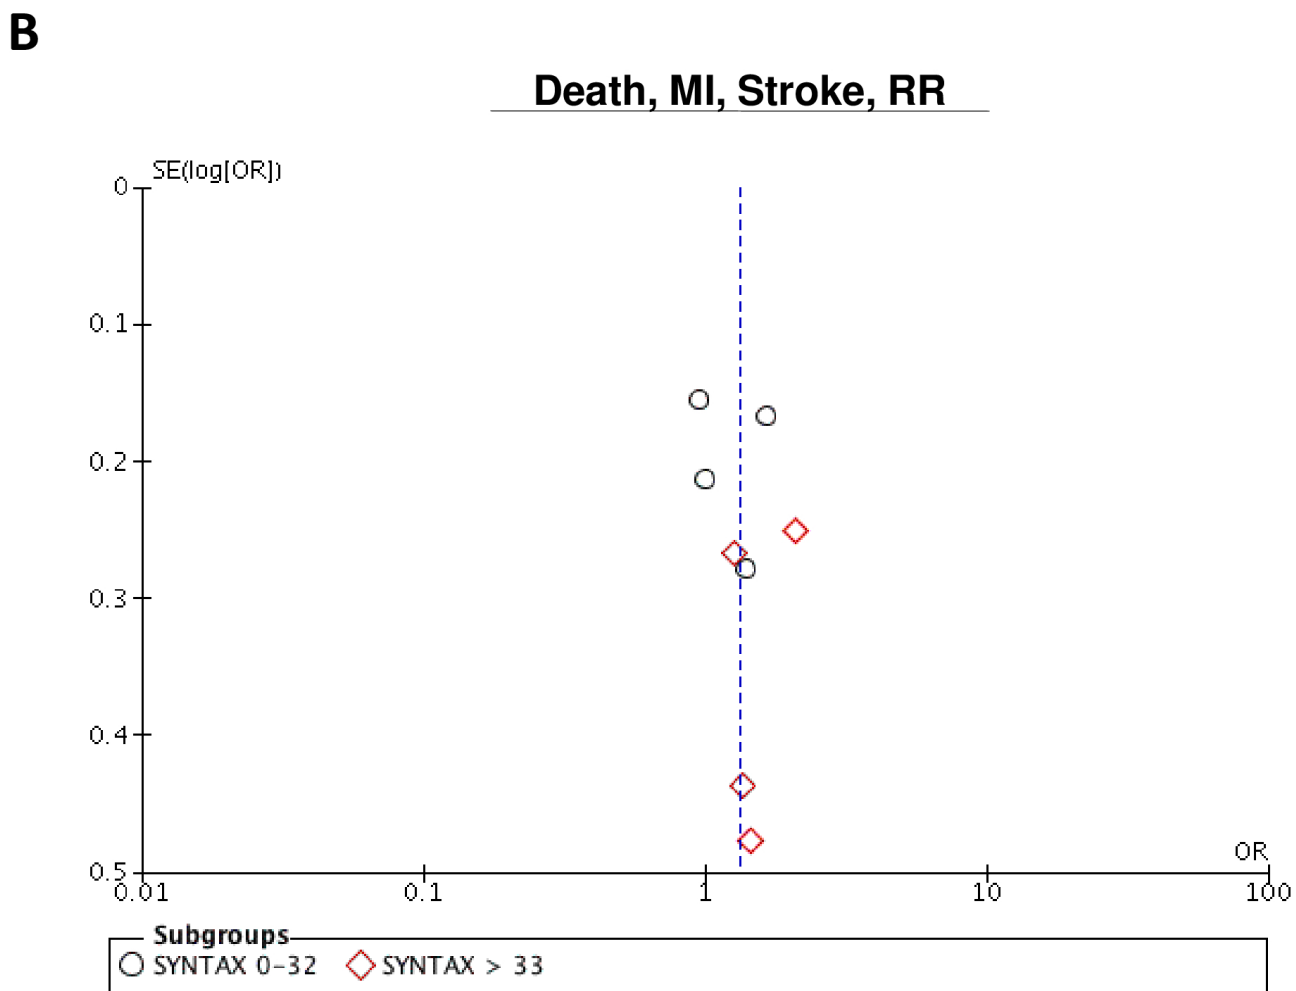

Supplement: 12872_2017_664_MOESM3_ESM.pdf [file 12872_2017_664_MOESM3_ESM.pdf]
